# Supplementary material for: Soil-mimetic eco-friendly fertilizer gates: nanoclay-reinforced binary carbohydrates for improving crop efficiency
Source: Royal Society of Chemistry journal article supplement (doi:10.1039/d3en00682d), 2024-01-01
Supplement: d3en00682d1.pdf [file d3en00682d1.pdf]

**Soil mimetic eco-friendly fertilizer gate: Nanoclay reinforced binary carbohydrate for crop  
efficiency**

**Bandana Kumari Sahu,<sup>1</sup> Kanchan Swami,<sup>1</sup> Neelesh Kapoor<sup>2</sup>, Ankit Agrawal,<sup>2</sup> Sarita  
Kataria,<sup>1</sup> Parul Sharma,<sup>1</sup> Priya Kundu<sup>1</sup>, Hema Thangavel,<sup>1</sup> Anusree Vattakkuniyil,<sup>1</sup> Om  
Prakash Chaurasia,<sup>3</sup> Vijayakumar Shanmugam<sup>1</sup>**

<sup>1</sup> Institute of Nano Science and Technology, Mohali, Punjab 140306, India

<sup>2</sup> Sardar Vallabhbhai Patel University of Agriculture and Technology, Meerut, UP 250110, India

<sup>3</sup> Defence Institute of High Altitude Research, Leh, Ladakh 194101, India

**\*Corresponding Author**

Vijayakumar Shanmugam

Email: [vijayakumarshanmugam@gmail.com](mailto:vijayakumarshanmugam@gmail.com)

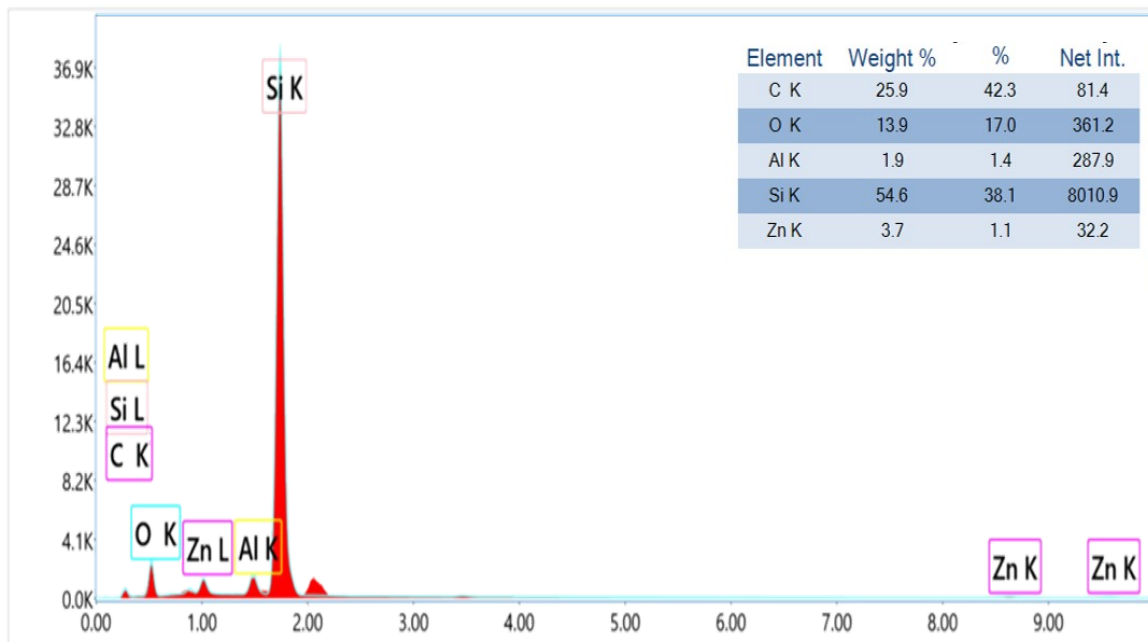

**Fig. S1.** Graph showing the EDX analysis of SEM image and inset showing the elemental quantification of EDX graph.

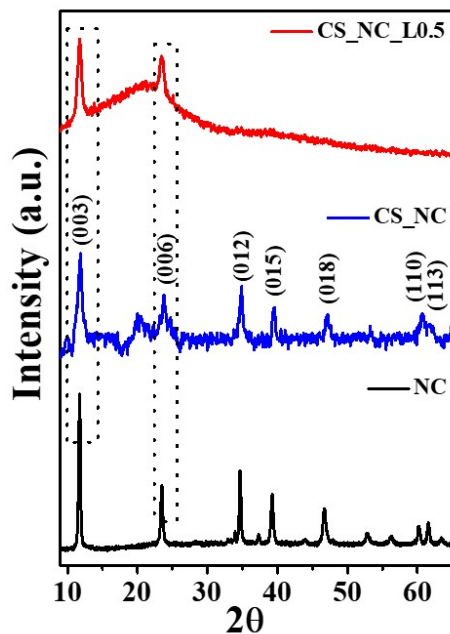

**Fig. S2.** XRD pattern of NC (normal scan), CS\_NC (normal scan) and CS\_NC\_L0.5 (slow scan).

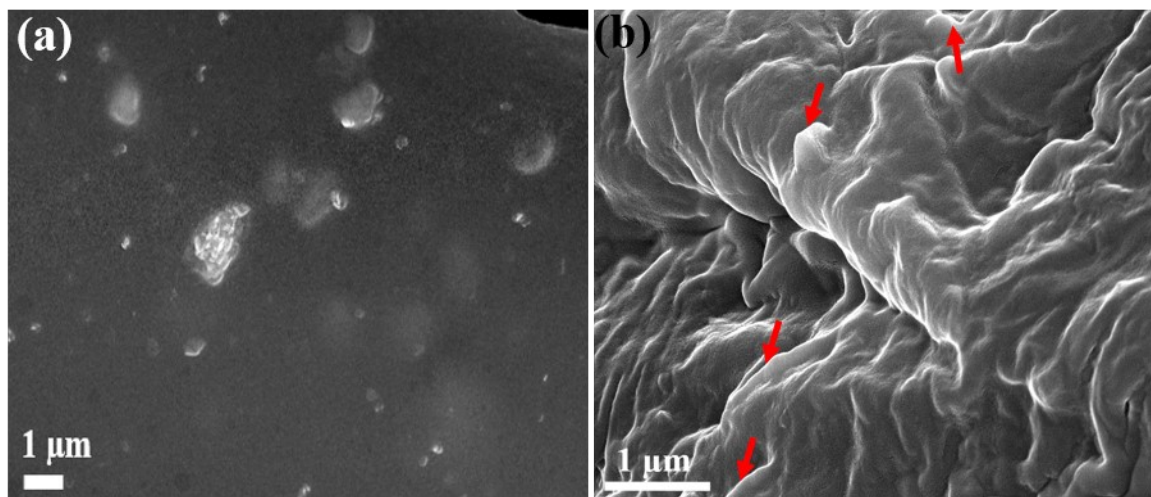

**Fig. S3.** SEM image showing the surface morphology of CS\_NC (a) and CS\_NC\_L0.5 (b).

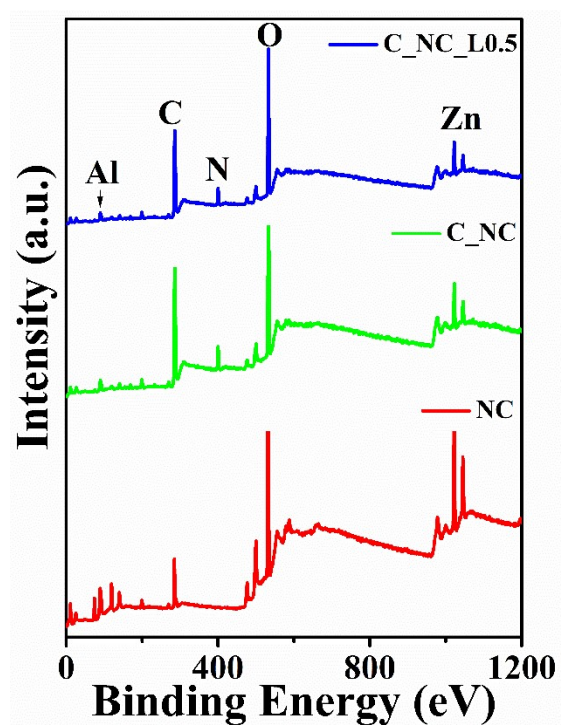

**Fig. S4.** Graph showing XPS survey spectra of NC, CS\_NC and CS\_NC\_L0.5.

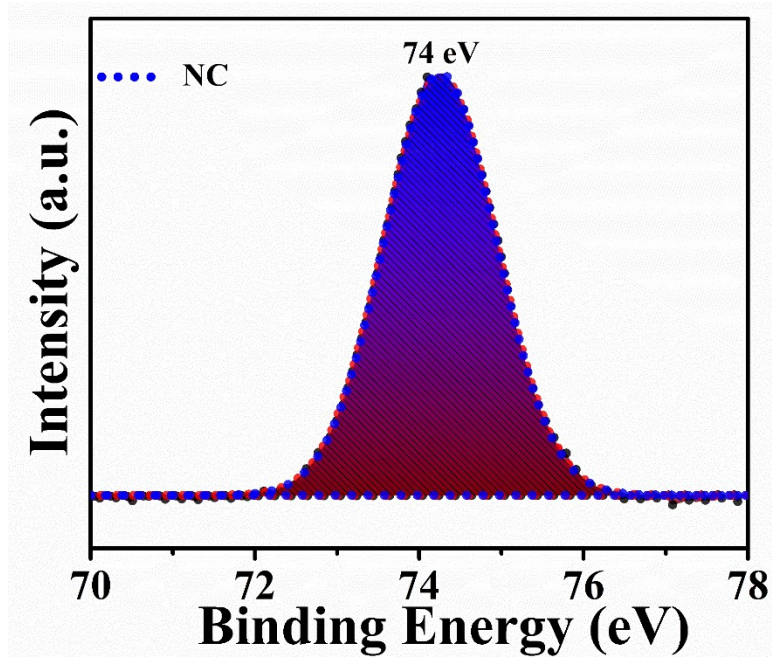

Fig. S5. Graph showing Al2p core level XPS spectra of NC.

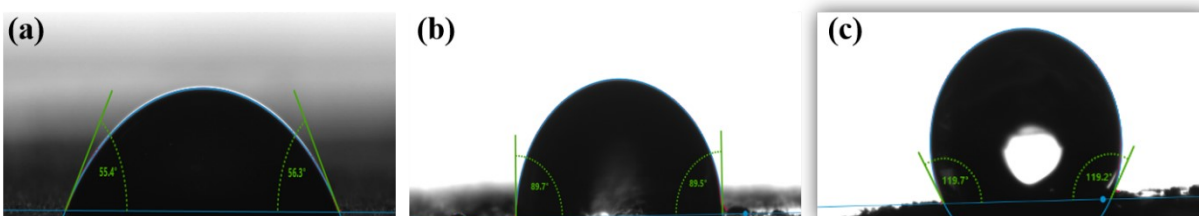

Fig. S6. Image showing water contact angle of (a) NC, (b) CS\_NC and (c) CS\_NC\_L0.5-4L.

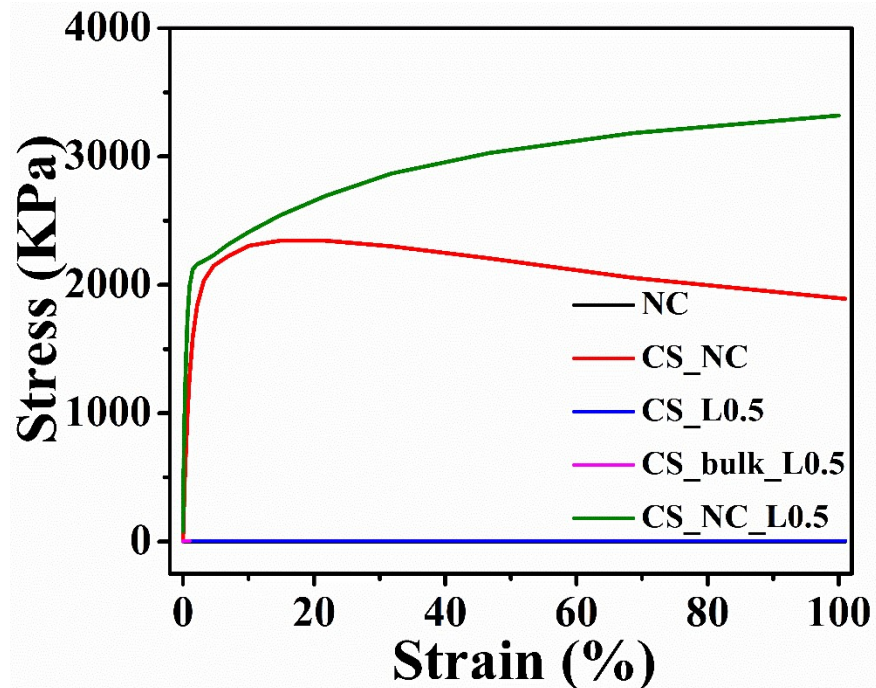

**Fig. S7.** Graph showing stress-strain curve of NC, CS\_NC, CS\_L0.5, CS\_bulk\_L0.5 and CS\_NC\_L0.5.

| Coated pellets | Batch-1<br>thickness<br>( $\mu\text{m}$ ) | Batch-2<br>thickness<br>( $\mu\text{m}$ ) | Batch-3<br>thickness<br>( $\mu\text{m}$ ) | Average<br>thickness<br>( $\mu\text{m}$ ) |
|----------------|-------------------------------------------|-------------------------------------------|-------------------------------------------|-------------------------------------------|
| CP0.5-2L       | 2.6                                       | 2.6                                       | 2.6                                       | $2.6 \pm 0.0$                             |
| CP0.5-3L       | 4.6                                       | 4                                         | 4.9                                       | $4.5 \pm 0.45$                            |
| CP0.5-4L       | 6.9                                       | 5.9                                       | 6                                         | $6.2 \pm 0.55$                            |

**Table. S1.** Thickness of the coated MOP pellets

Average thickness values are expressed as in mean  $\pm$  SD.

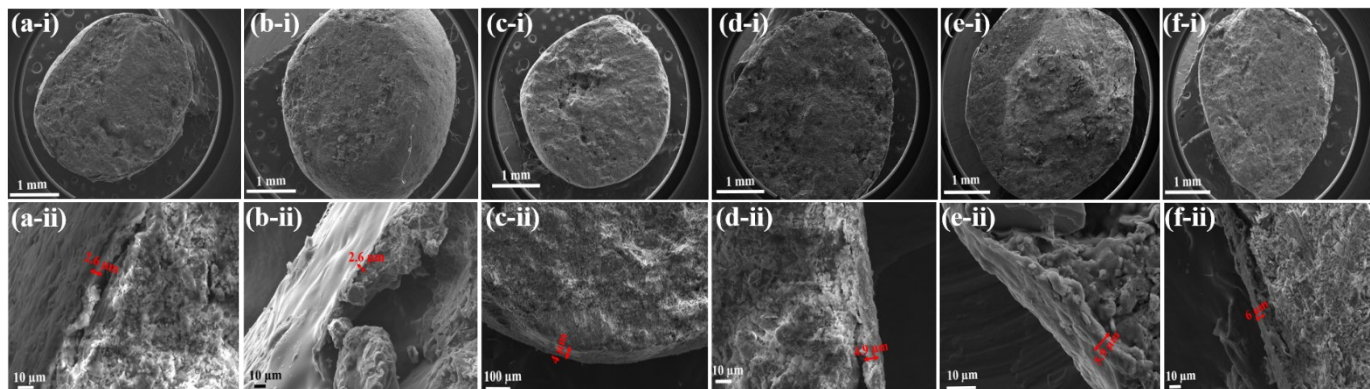

**Fig. S8.** SEM image showing the cross-section [a-i (batch-2), b-i (batch-3), c-i (batch-2), d-i (batch-3), e-i (batch-2) and f-i (batch-3)] and thickness of [a-i (batch-2), b-i (batch-3), c-i (batch-2), d-i (batch-3), e-i (batch-2) and f-i (batch-3)] CP0.5-2L, CP0.5-3L and CP0.5-4L, marked with the red arrows respectively.

**Table. S2.** Potassium release behavior of uncoated and coated (CP0.5-2L, CP0.5-3L and CP0.5-4L) MOP pellets in water at different time intervals (0, 10, 20, 30, 40 and 50 days)

| Time interval<br>(days) | Control            | CP0.5-2L            | CP-0.5-3L           | CP0.5-4L            |
|-------------------------|--------------------|---------------------|---------------------|---------------------|
| 0                       | 1.01 <sup>af</sup> | 0.933 <sup>bf</sup> | 0.966 <sup>bf</sup> | 0.91 <sup>cf</sup>  |
| 10                      | 93.5 <sup>ae</sup> | 4.78 <sup>be</sup>  | 4.81 <sup>be</sup>  | 4.6 <sup>ce</sup>   |
| 20                      | 95.5 <sup>ad</sup> | 11.11 <sup>bd</sup> | 11.15 <sup>bd</sup> | 9.41 <sup>cd</sup>  |
| 30                      | 95.6 <sup>ac</sup> | 22.08 <sup>bc</sup> | 22.08 <sup>bc</sup> | 19.1 <sup>cc</sup>  |
| 40                      | 95.5 <sup>ab</sup> | 27.5 <sup>bb</sup>  | 27.4 <sup>bb</sup>  | 26.78 <sup>cb</sup> |
| 50                      | 96 <sup>aa</sup>   | 35.2 <sup>ba</sup>  | 35.06 <sup>ba</sup> | 34.3 <sup>ca</sup>  |



The notations represent the significant variations among the data at  $p \leq 0.05$  where 1st notation is for treatments (control, CP0.5-2L, CP0.5-3L and CP0.5-4L) and 2nd notation is for time intervals (0, 10, 20, 30, 40 and 50 days)

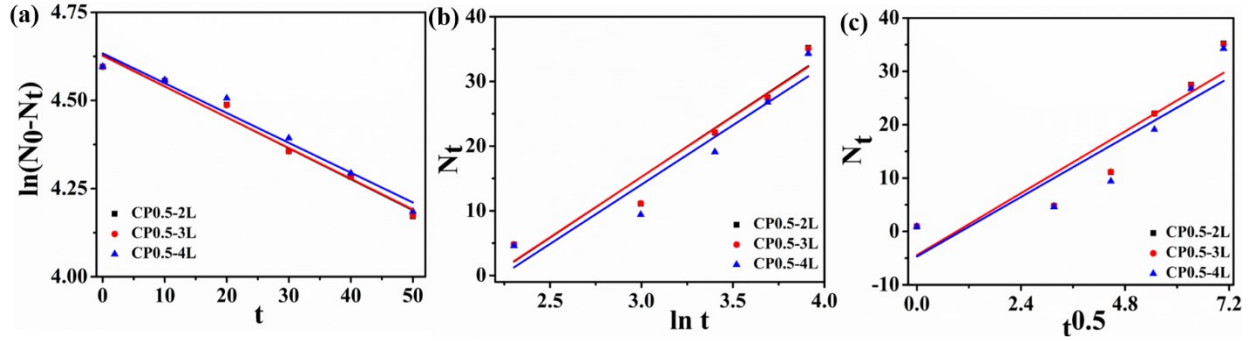

**Fig. S9.** Graph showing release kinetics of potassium release from coated fertilizers (CP0.5-2L, CP0.5-3L and CP0.5-4L) based on (a) first-order, (b) simple elovich and (c) parabolic diffusion.

**Table. S3.** Standard errors of estimates (SE), coefficient of determination ( $R^2$ ) of first-order, simple elovich, parabolic diffusion and kinetics parameters of korsmeyer-peppas model.

| Coated fertilizer | First-order |       | Simple elovich |        | Parabolic diffusion |       | Korsmeyer-peppas |       |      |
|-------------------|-------------|-------|----------------|--------|---------------------|-------|------------------|-------|------|
|                   | $R^2$       | SE    | $R^2$          | SE     | $R^2$               | SE    | $R^2$            | SE    | n    |
| <b>CP0.5-2L</b>   | 0.89        | 0.013 | 0.84           | 334.36 | 0.84                | 42.09 | 0.996            | 0.054 | 1.26 |
| <b>CP0.5-3L</b>   | 0.89        | 0.012 | 0.85           | 326.43 | 0.84                | 40.75 | 0.996            | 0.055 | 1.25 |
| <b>CP0.5-4L</b>   | 0.90        | 0.010 | 0.84           | 320.91 | 0.83                | 40.85 | 0.996            | 0.042 | 1.29 |

**Table. S4.** Increased yield (both biological and economic yield) percentage, NUE and harvest index of different treatments (T1-B-100 and T2-B-75)

| Treatment                      | T1-B-100     | T2-B-75     |
|--------------------------------|--------------|-------------|
| Increased economic yield (%)   | 13.3 ± 3.0   | 17 ± 3.3    |
| NUE                            | 2.8 ± 0.04   | 5 ± 0.19    |
| Increased biological yield (%) | 9.9 ± 1.3    | 14.8 ± 0.93 |
| Harvest index (HI)             | 14.16 ± 0.23 | 15.5 ± 0.18 |

Values are expressed as in mean ± SD and all the data are statistically significant at  $p \leq 0.05$ .

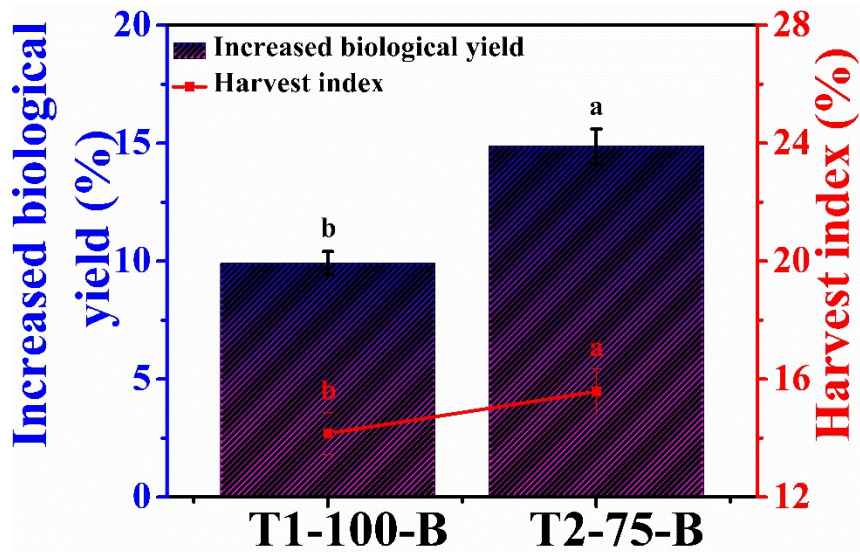

**Fig. S10.** Graph showing increased biological yield and harvest index of different treatments (T1-B-100 and T2-B-75).



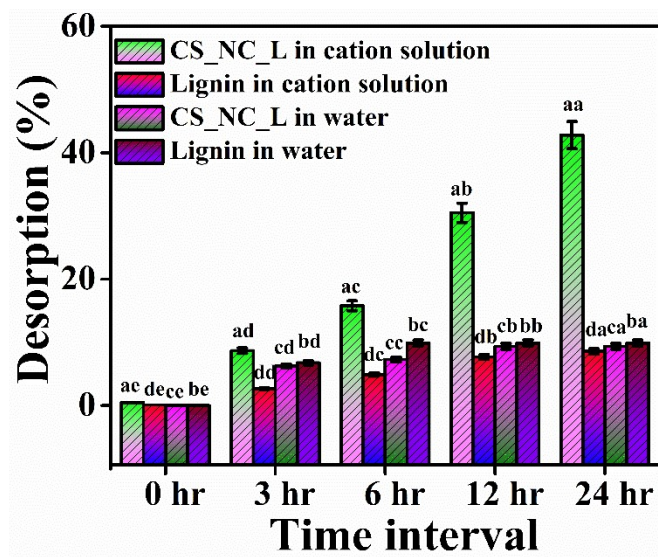

**Fig. S11.** Graph showing desorption percentage of CS\_NC\_L and lignin in cationic and water solution at different time intervals (0, 3, 6, 12 and 24 hr).

**Table. S5.** Roughness of the CS\_NC\_L0.5 and Lignin before and after laccase treatment

| Laccase treated sample | Roughness (nm) |
|------------------------|----------------|
| CS_NC_L0.5 (Before)    | 180 ± 1.2      |
| CS_NC_L0.5 (After)     | 708.8 ± 28.7   |
| Lignin (Before)        | 479 ± 3.4      |
| Lignin (After)         | 3049.2 ± 131.9 |

Values are expressed in mean ± SD and all the data are statistically significant at  $p \leq 0.05$

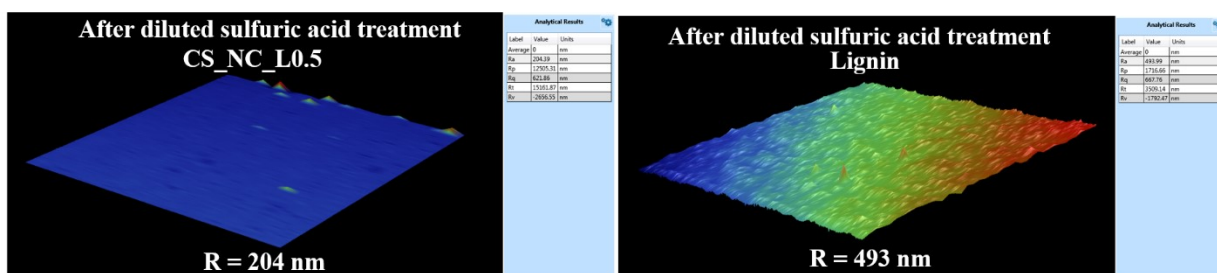

**Fig. S12.** Surface profilometer image showing the effect of diluted sulfuric acid on the CS\_NC\_L0.5 and lignin coating.

**Table S6.** Comparison of life cycle impacts for CS\_NC\_L coated MOP and GO-polymer latex composite coated KNO<sub>3</sub> to produce 1 kg of potash fertilizer using Greendelta open LCA 2.0.2.

| Impact category (unit)                            | CS_NC_L coated MOP (A) | GO-polymer latex composite coated KNO <sub>3</sub> (B) | (B)/(A) |
|---------------------------------------------------|------------------------|--------------------------------------------------------|---------|
| Freshwater eutrophication (kg P eq)               | 1.3847E-10             | 1.1106E-11                                             | 12.4676 |
| Global warming (kg CO <sub>2</sub> eq)            | 8.2158E-07             | 9.0785E-08                                             | 9.0497  |
| Human carcinogenic toxicity (kg 1,4-DCB)          | 4.9079E-08             | 7.1516E-09                                             | 6.8626  |
| Marine eutrophication (kg N eq)                   | 7.3542E-10             | 2.0934E-11                                             | 35.1305 |
| Terrestrial acidification (kg SO <sub>2</sub> eq) | 2.2797E-07             | 2.3484E-08                                             | 9.7076  |
| Terrestrial ecotoxicity (kg 1,4-DCB)              | 4.8944E-06             | 3.7628E-07                                             | 13.0074 |
| Water consumption (m <sup>3</sup> )               | 9.0597E-08             | 3.7104E-09                                             | 24.4170 |
| Stratospheric ozone depletion (kg CFC11 eq)       | 1.5252E-07             | 4.8788E-08                                             | 3.1261  |
